# Supplementary material for: High-Density Linkage Map Construction and Mapping of Salt-Tolerant QTLs at Seedling Stage in Upland Cotton Using Genotyping by Sequencing (GBS)
Source: MDPI journal article supplement (doi:10.3390/ijms18122622), 2017-12-05
Supplement: s1 [file s1]

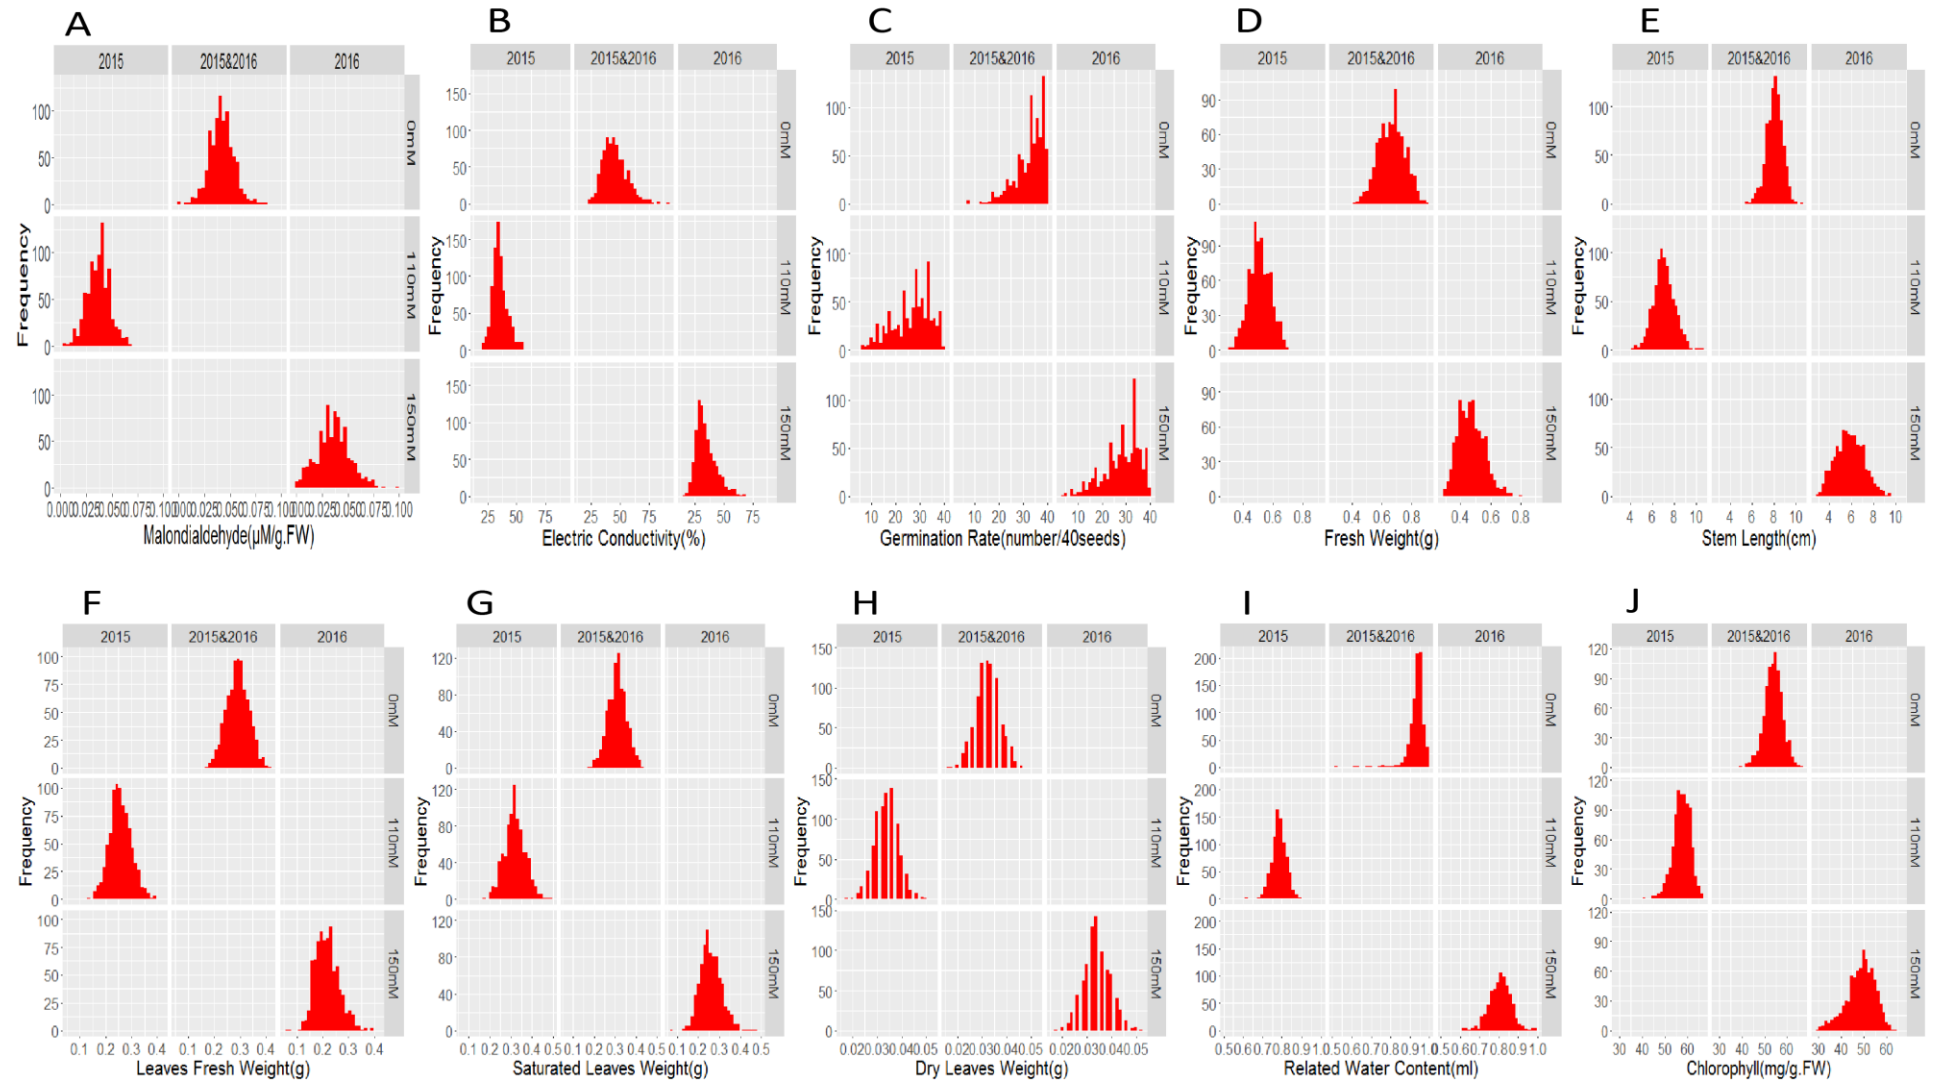

**Figure S1:** Frequency distribution of the 10 traits measured under 3 treatments during 2 years and combine analysis; **MDA:** Malondialdehyde; **EC:** Electric Conductivity; **GR:** Germination Rate; **FW:** Fresh Weight; **SL:** Stem Length; **LFW:** Leaves Fresh Weight; **SLW:** Saturated Leaves Weight; **DLW:** Dry Leaves Weight; **RWC:** Related Water Content and **CHL:** Chlorophyll. For the traits unit see **Figure 1**.
